# Supplementary material for: Zearalenone and ß-Zearalenol But Not Their Glucosides Inhibit Heat Shock Protein 90 ATPase Activity
Source: Front Pharmacol. 2019 Oct 18;10:1160. doi: 10.3389/fphar.2019.01160 (PMC6813925; doi:10.3389/fphar.2019.01160)
Supplement: Supplementary file 1 [file DataSheet_1.pdf]

## *Supplementary Figures*

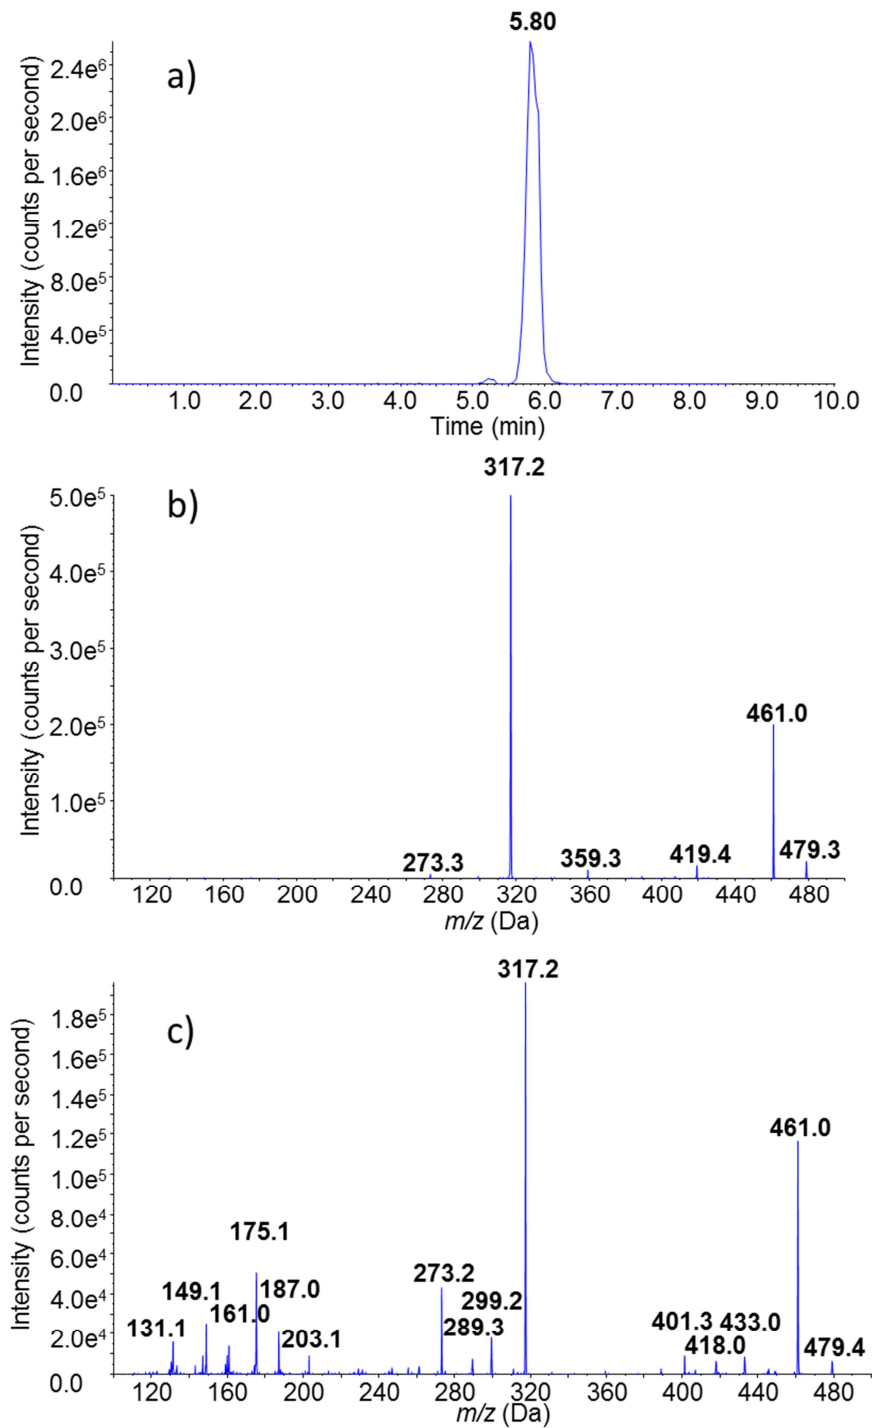

**Supplementary Figure S1:** Zearalenone-14-*O*-glucoside

- a) Extracted ion chromatogram of an enhanced product ion scan (EPI) of  $m/z$  479.2 showing  $m/z$  316.95 to 317.45
- b) EPI scan of  $m/z$  479.2 at a collision energy of -30 V
- c) EPI scan of  $m/z$  479.2 at a collision energy of -50 V

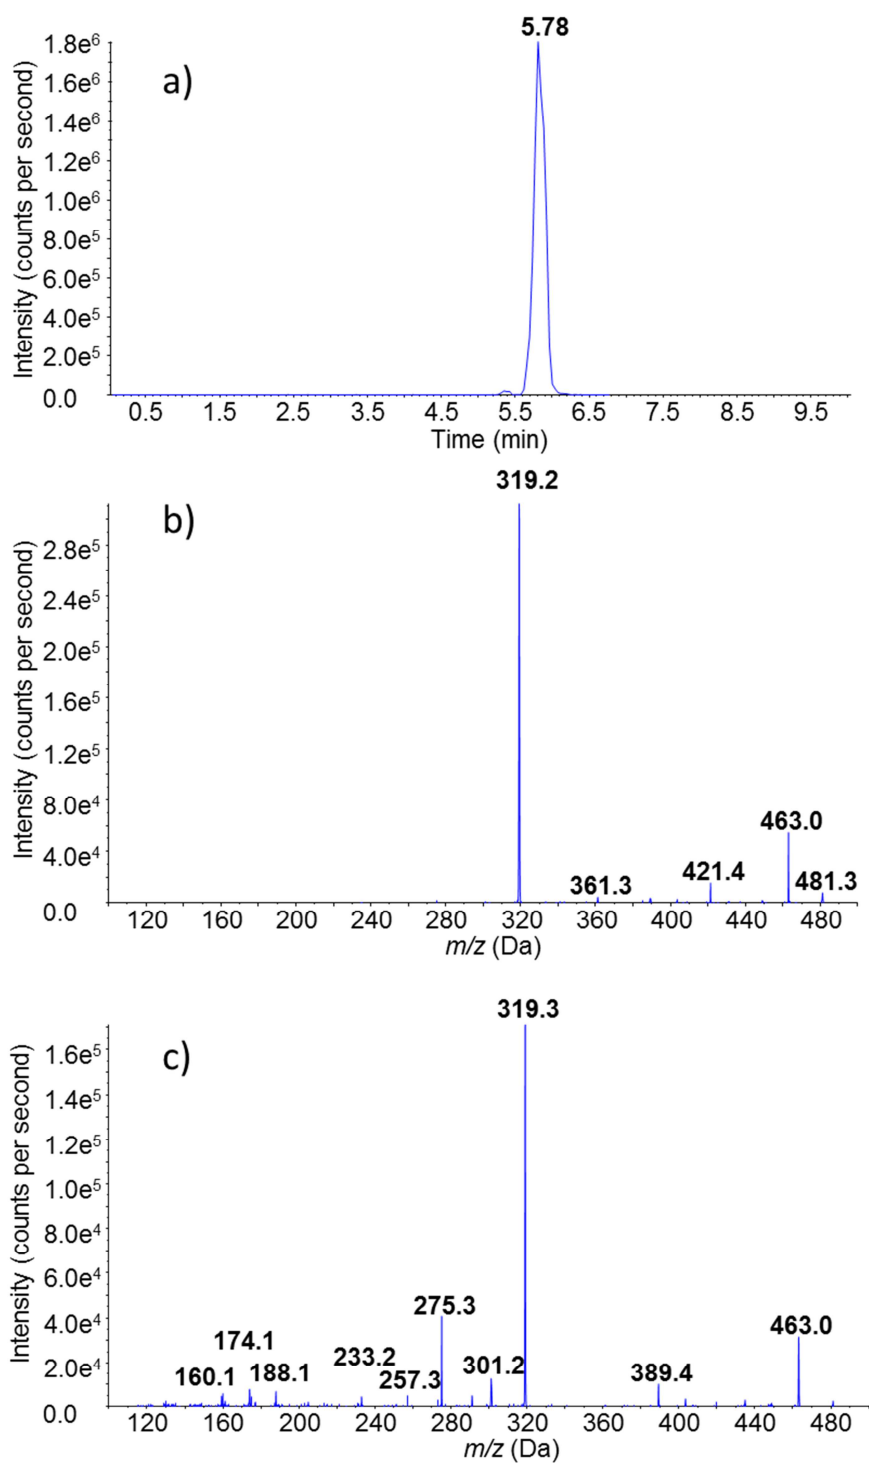

**Supplementary Figure S2:  $\alpha$ -Zearalenol-14-*O*-glucoside**

- a) Extracted ion chromatogram of an enhanced product ion scan (EPI) of  $m/z$  481.2 showing  $m/z$  318.95 to 319.45
- b) EPI scan of  $m/z$  481.2 at a collision energy of -30 V
- c) EPI scan of  $m/z$  481.2 at a collision energy of -50 V

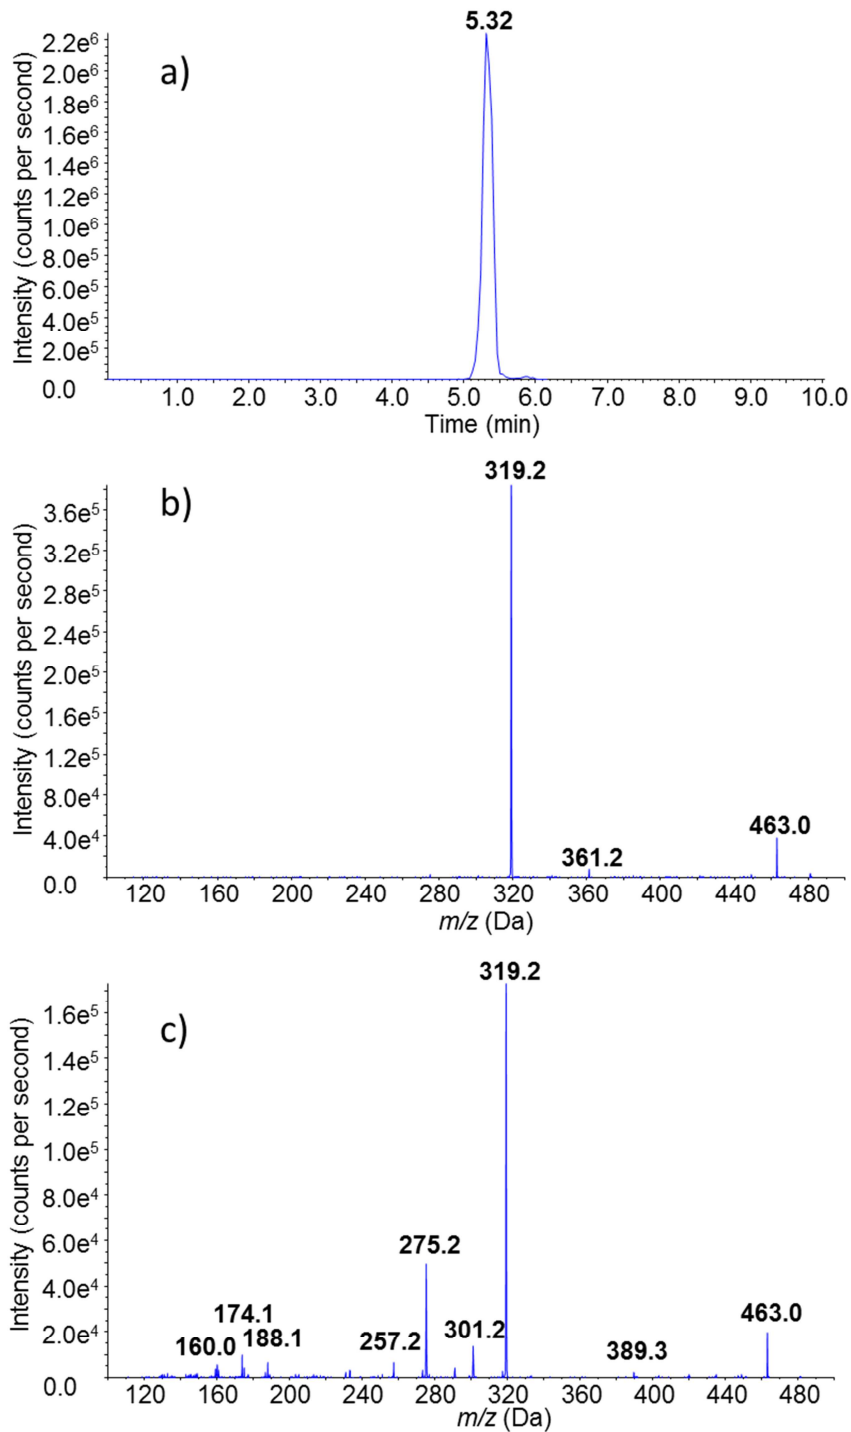**Supplementary Figure S3:  $\beta$ -Zearalenol-14-*O*-glucoside**

- a) Extracted ion chromatogram of an enhanced product ion scan (EPI) of  $m/z$  481.2 showing  $m/z$  318.95 to 319.45
- b) EPI scan of  $m/z$  481.2 at a collision energy of -30 V
- c) EPI scan of  $m/z$  481.2 at a collision energy of -50 V

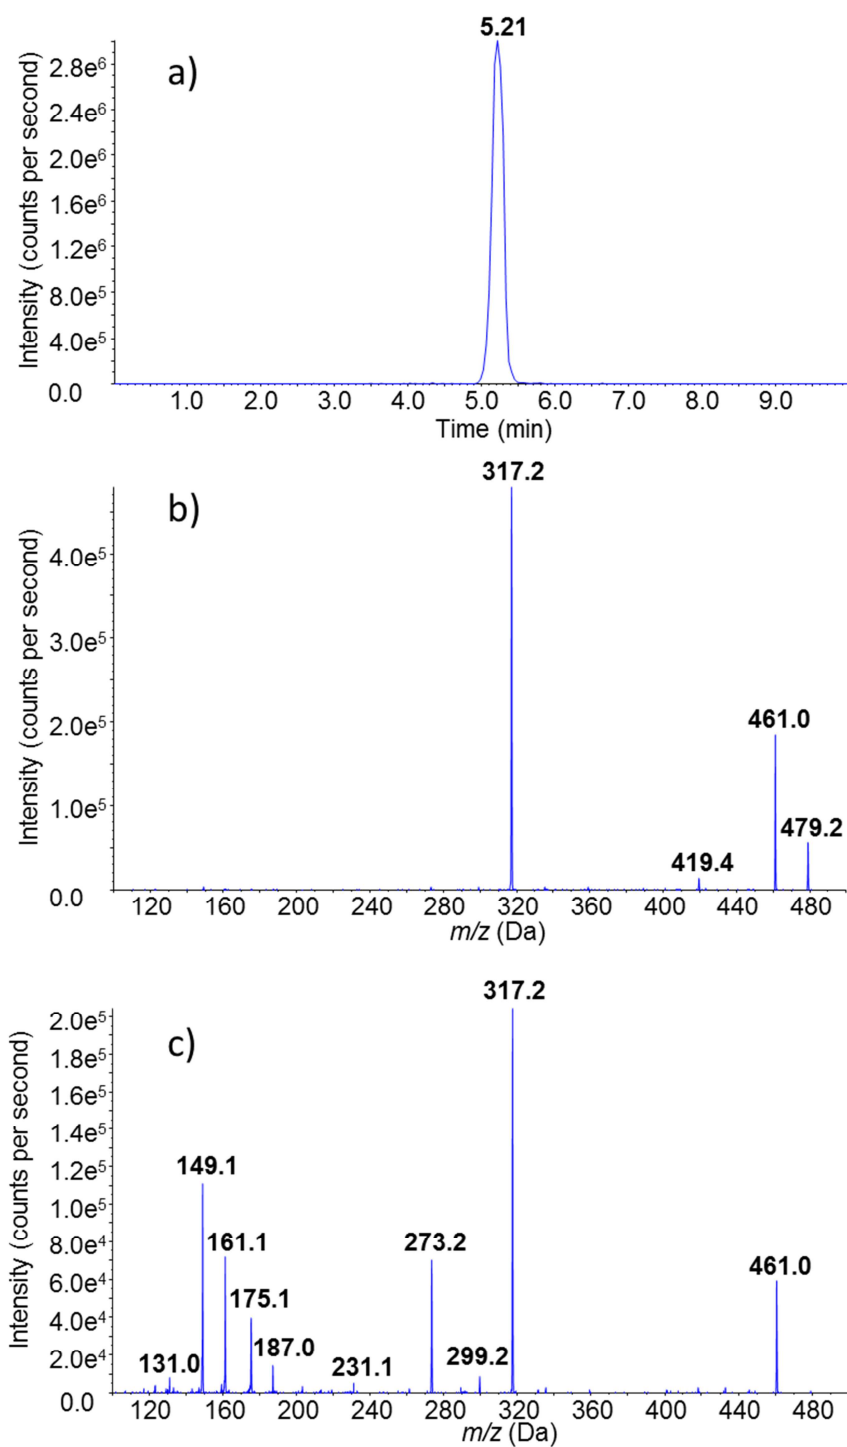

**Supplementary Figure S4: Zearalenone-16-*O*-glucoside**

- a) Extracted ion chromatogram of an enhanced product ion scan (EPI) of  $m/z$  479.2 showing  $m/z$  316.95 to 317.45
- b) EPI scan of  $m/z$  479.2 at a collision energy of -30 V
- c) EPI scan of  $m/z$  479.2 at a collision energy of -50 V

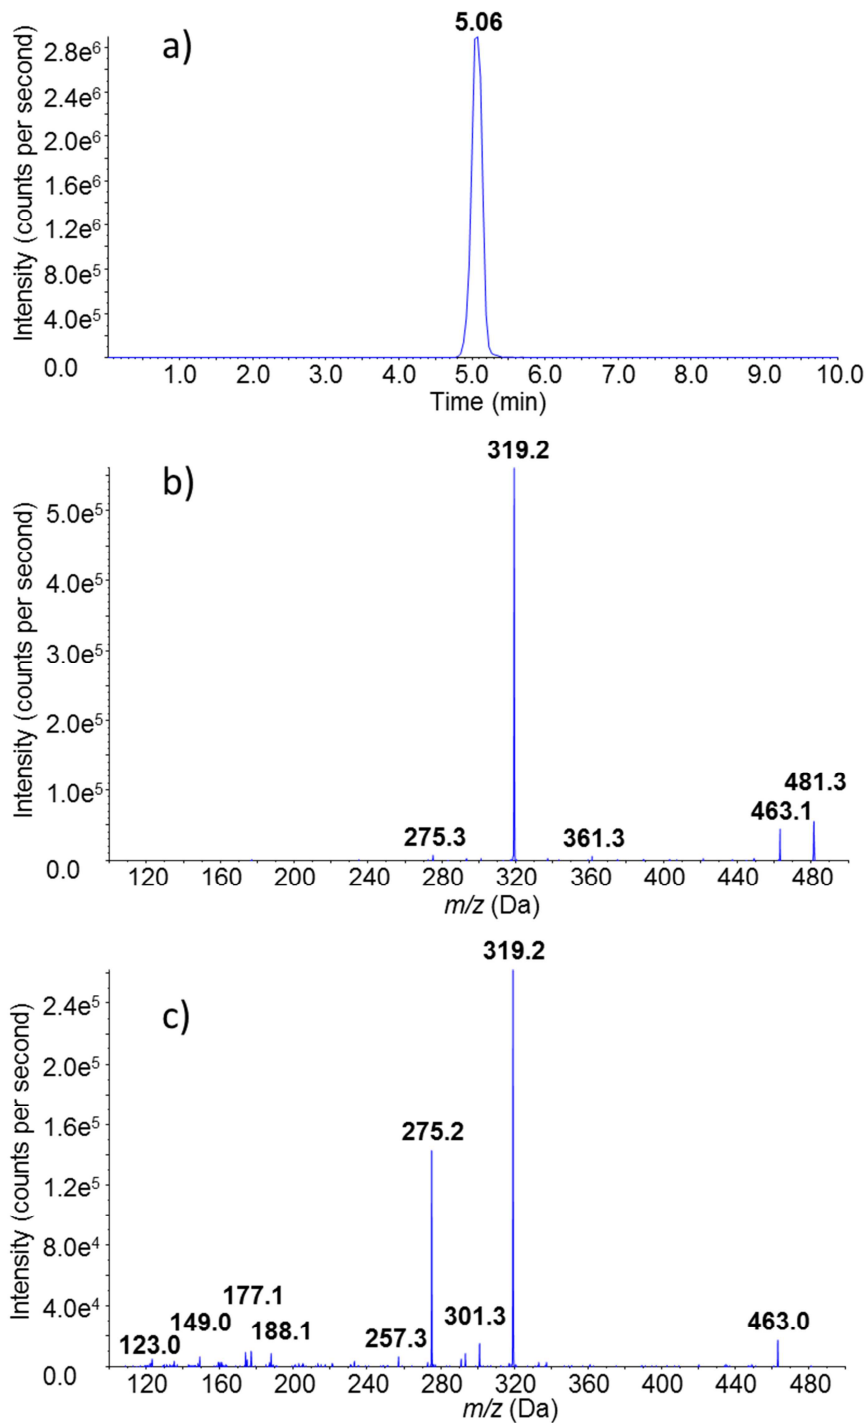**Supplementary Figure S5:  $\alpha$ -Zearalenol-16-*O*-glucoside**

- a) Extracted ion chromatogram of an enhanced product ion scan (EPI) of  $m/z$  481.2 showing  $m/z$  318.95 to 319.45
- b) EPI scan of  $m/z$  481.2 at a collision energy of -30 V
- c) EPI scan of  $m/z$  481.2 at a collision energy of -50 V

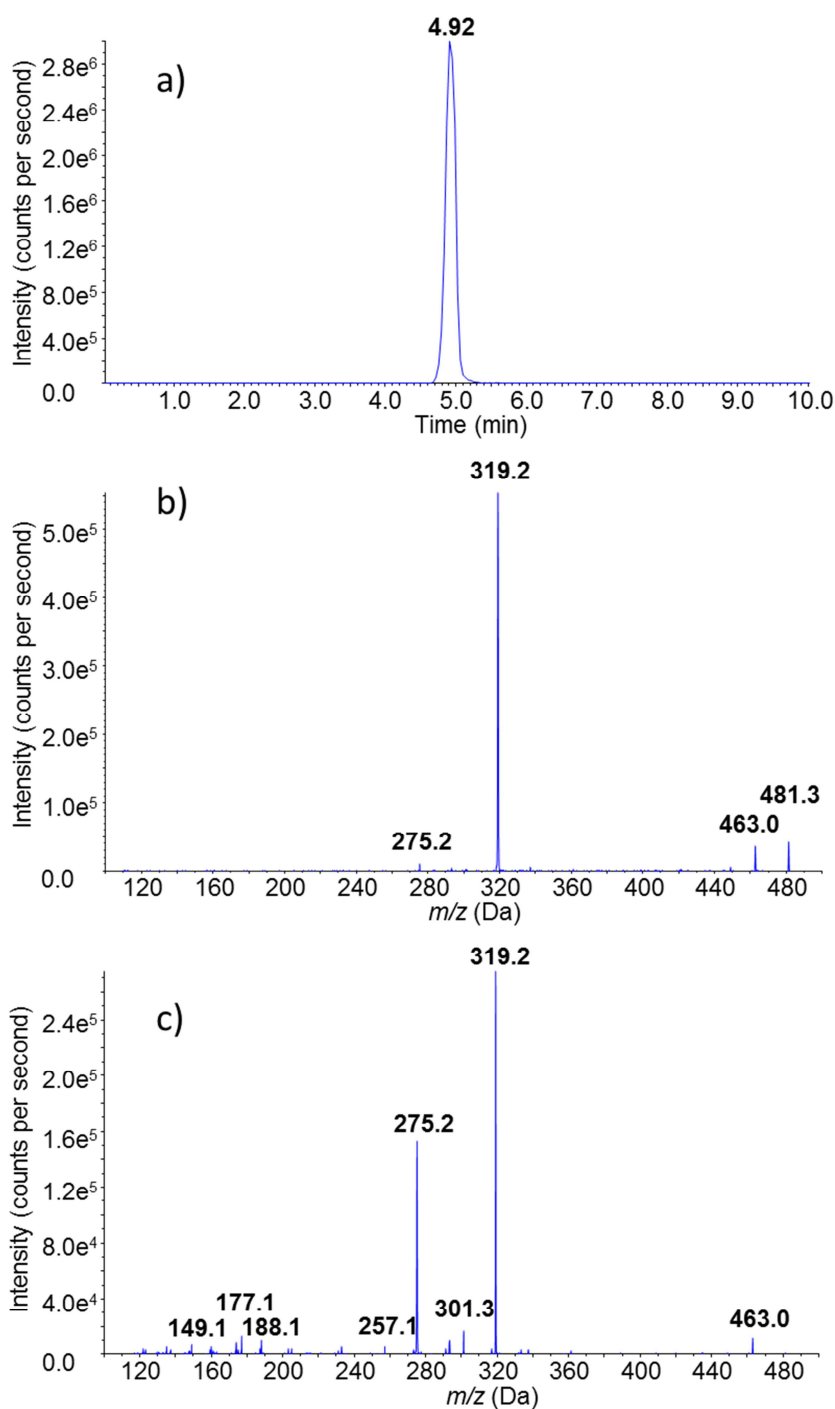

**Supplementary Figure S6:  $\beta$ -Zearalenol-16-*O*-glucoside**

- a) Extracted ion chromatogram of an enhanced product ion scan (EPI) of  $m/z$  481.2 showing  $m/z$  318.95 to 319.45
- b) EPI scan of  $m/z$  481.2 at a collision energy of -30 V
- c) EPI scan of  $m/z$  481.2 at a collision energy of -50 V
